# Supplementary material for: Samarium and manganese incorporation to improve color rendering of LuAG:Ce3+ phosphor ceramics for laser-driven lighting: a Color-tunable and energy transfer study
Source: Royal Society of Chemistry journal article supplement (doi:10.1039/d1tc04370f), 2021-01-01
Supplement: d1tc04370f1.pdf [file d1tc04370f1.pdf]

## Electronic Supplementary Information

### **Samarium and manganese incorporation to improve color rendering of LuAG:Ce<sup>3+</sup> phosphor ceramic for laser-driven lighting: Color-tunable and energy transfer study**

*Bingheng Sun*<sup>a, b</sup>, *Benxue Jiang*<sup>a\*</sup>, *Long Zhang*<sup>a\*</sup>

<sup>a</sup> Key Laboratory of Materials for High Power Laser, Shanghai Institute of Optics and Fine Mechanics, Chinese Academy of Sciences, Shanghai 201800

<sup>b</sup> University of Chinese Academy of Sciences

\* To whom correspondence should be addressed.

E-mail: [jiangsic@foxmail.com](mailto:jiangsic@foxmail.com)

#### **Supplementary Information**

The in-line transmission spectra and appearances of polished LuAG:0.04Sm<sup>3+</sup> and LuAG:0.02Ce<sup>3+</sup>,0.04Sm<sup>3+</sup> ceramics (1.0 mm thick) were shown in Fig. S3. These samples presented a transparent appearance, and the words behind them could be recognized by naked eyes under daylight. The in-line transmittance of LuAG:0.02Ce<sup>3+</sup>,0.04Sm<sup>3+</sup> ceramic reached 83.3% at 800 nm, which was higher than that of LuAG:0.04Sm<sup>3+</sup> ceramic (73.8% at 800 nm). This result implies appropriate rare earth or transition ions doping is in favor of promoting densification process in sintering stage, thus improving optical quality of LuAG:0.02Ce<sup>3+</sup>,0.04Sm<sup>3+</sup> ceramic. Similar phenomenon has been reported in other literatures.<sup>1, 2</sup> In addition, two broad absorption band located at 340 and 445 nm were originated from 4f-5d<sup>1</sup> and 4f-5d<sup>2</sup> transition of Ce<sup>3+</sup> in LuAG:0.02Ce<sup>3+</sup>,0.04Sm<sup>3+</sup> ceramic, respectively. Although most of the intrinsic absorption bands of Sm<sup>3+</sup> were covered by those of Ce<sup>3+</sup>, while an absorption centered at 377 nm could also be observed in Ce<sup>3+</sup>, Sm<sup>3+</sup> co-doped samples, corresponding to the <sup>6</sup>H<sub>5/2</sub>-<sup>6</sup>P<sub>7/2</sub> transition of Sm<sup>3+</sup> ion.

Supplementary Figures

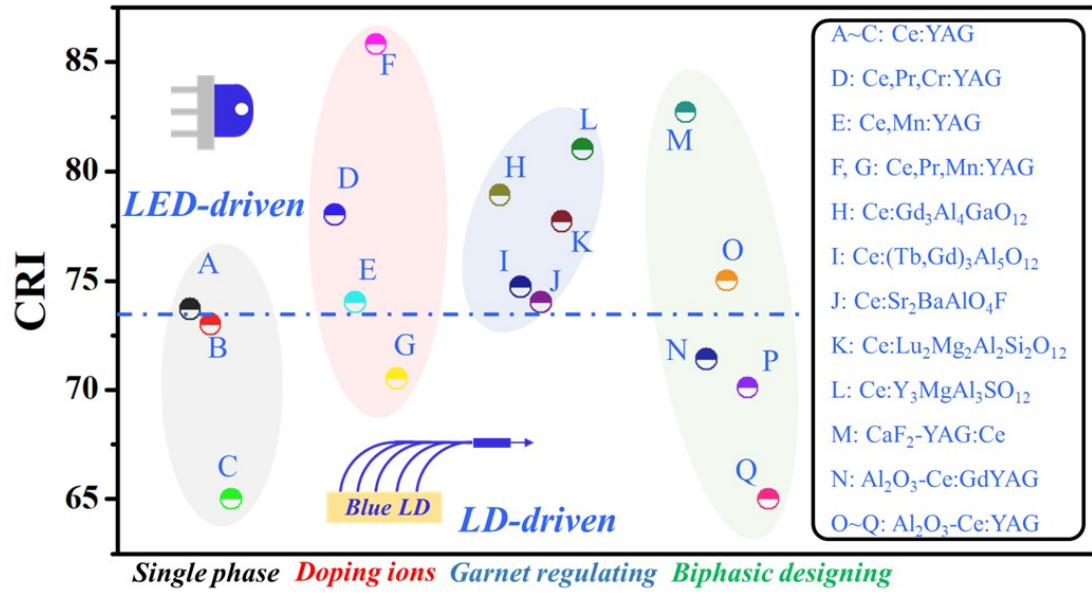

Single structured phosphor ceramic

Fig. S1 The CRI value of single-structured phosphor ceramics based on different design strategies

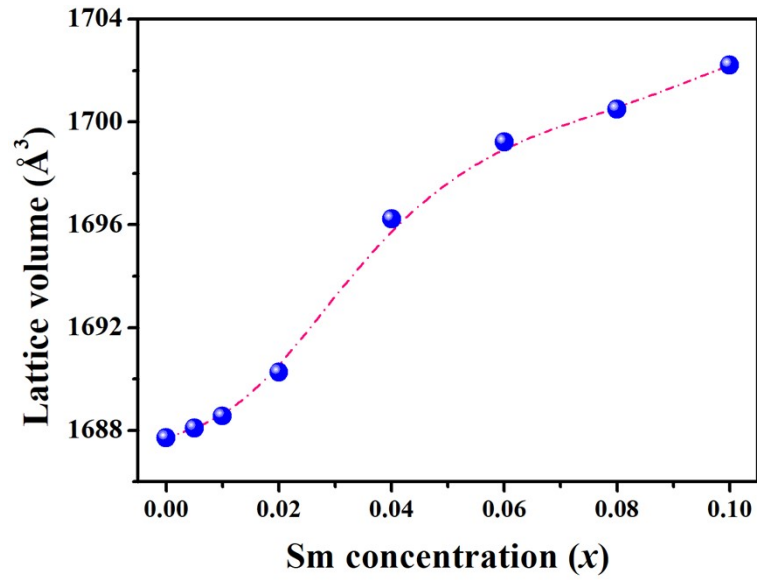

Fig. S2 Evolution of lattice volume depending on the Sm concentration

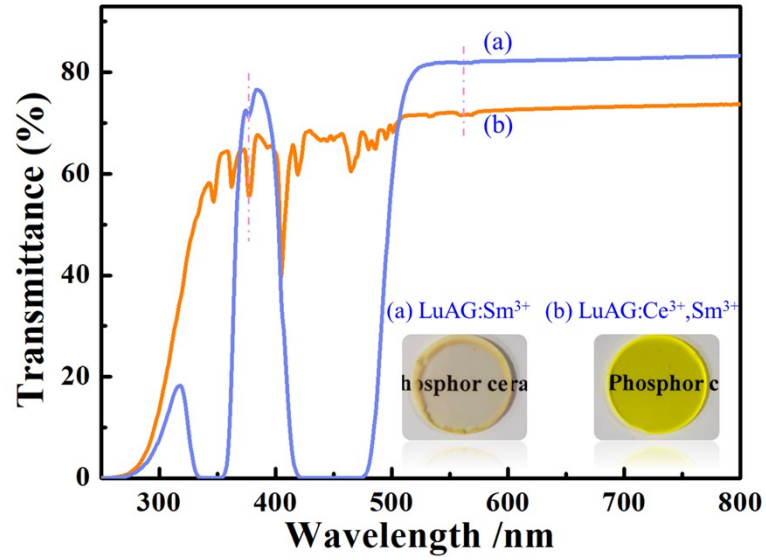

Fig. S3 In-line transmittance of as-prepared LuAG:0.04Sm<sup>3+</sup> and LuAG:0.02Ce<sup>3+</sup>,0.04Sm<sup>3+</sup> ceramics

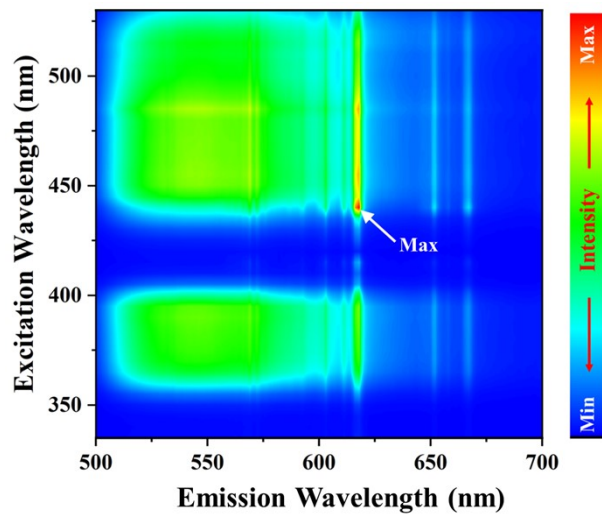

Fig. S4 Excitation-wavelength-dependent emission mappings for representative LuAG:0.02Ce<sup>3+</sup>,0.04Sm<sup>3+</sup> ceramics.

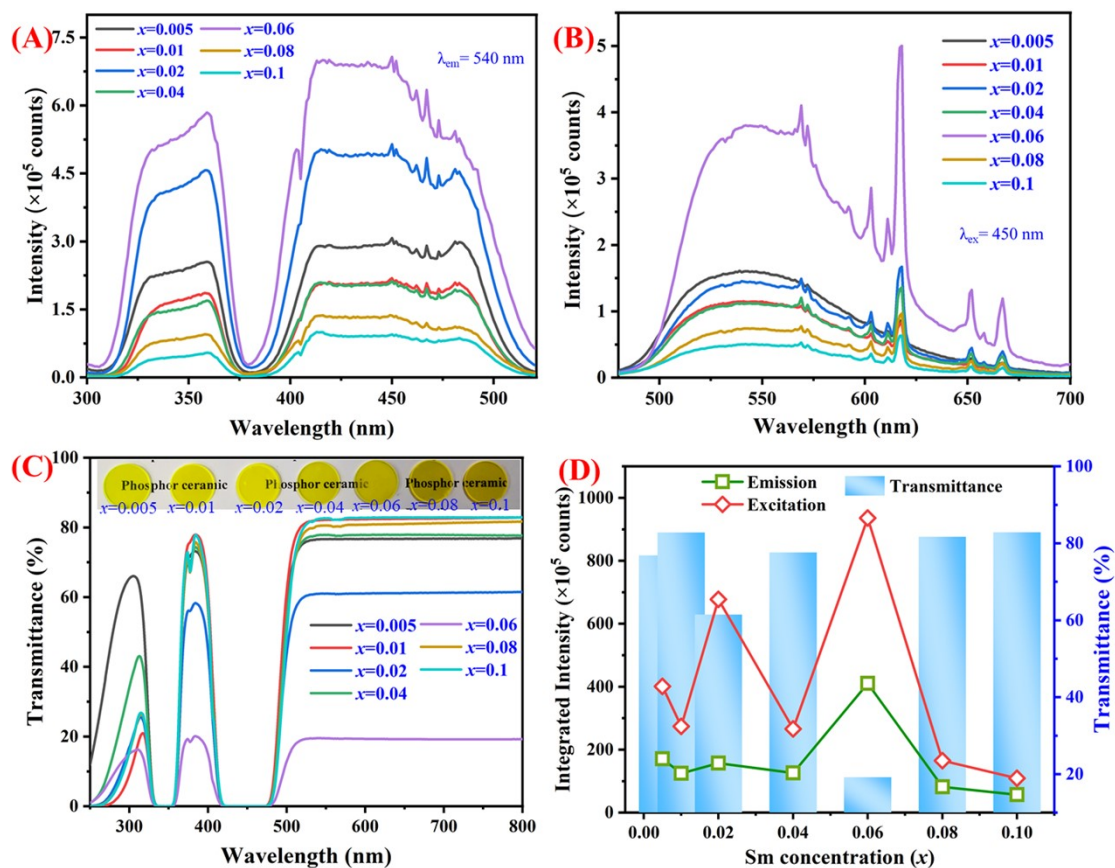

**Fig. S5** Excitation-wavelength-dependent emission mappings for representative LuAG:0.02Ce<sup>3+</sup>,0.04Sm<sup>3+</sup> ceramics.

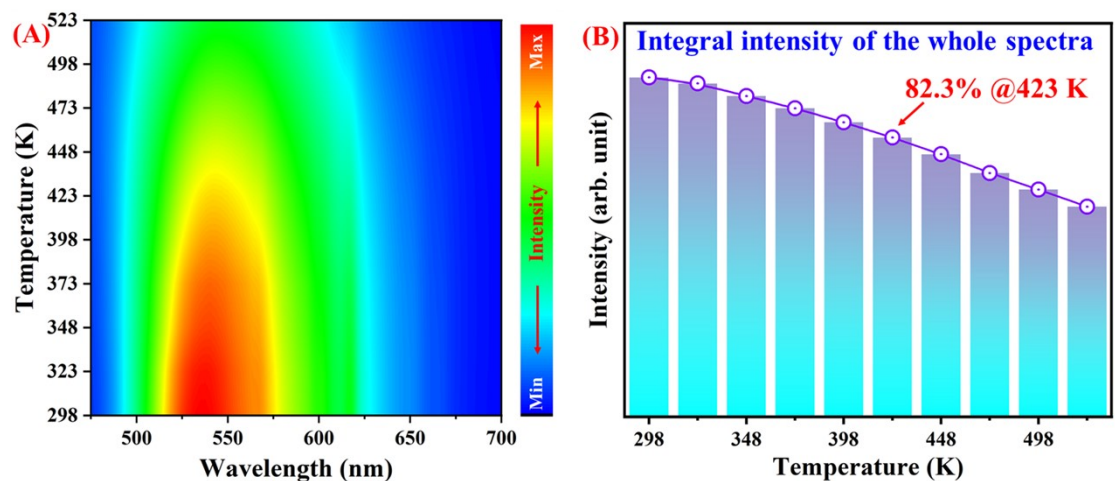

**Fig. S6** (A) Temperature-dependent PL spectrum of YAG:0.02Ce<sup>3+</sup>,0.04Sm<sup>3+</sup> ceramics. Trend of the integral intensity of (B) the whole spectra with the same temperature range.

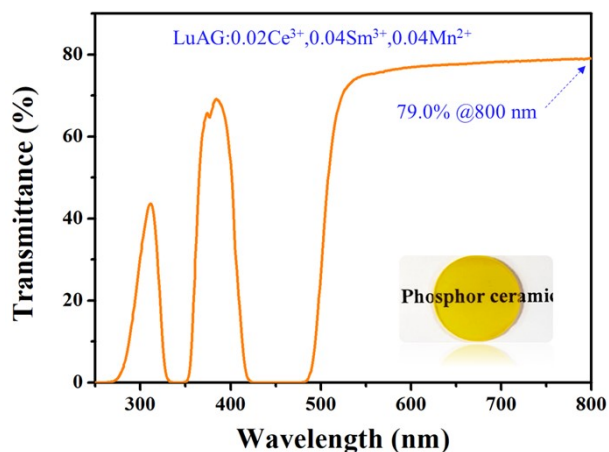

**Fig. S7 In-line transmittance and appearance of as-prepared**

**LuAG:0.02Ce<sup>3+</sup>,0.04Sm<sup>4+</sup>,0.04Mn<sup>2+</sup> ceramic**

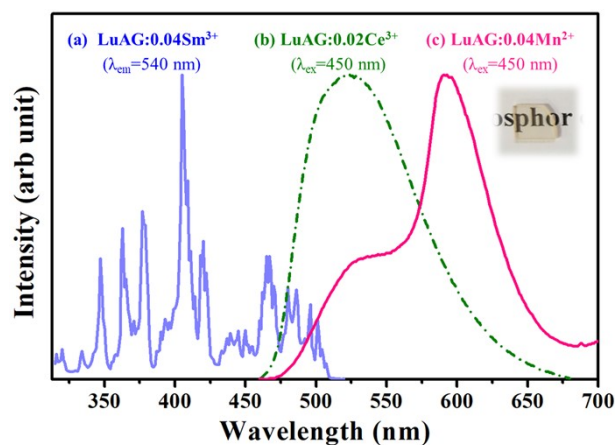

**Fig. S8 PLE spectrum (curve a,  $\lambda_{em}$ =618 nm) of LuAG:0.04Sm<sup>3+</sup>**

**ceramics and PL spectrum of LuAG:0.02Ce<sup>3+</sup> (curve b,  $\lambda_{ex}$ =450 nm) and**

**LuAG:0.04Mn<sup>2+</sup> (curve c,  $\lambda_{ex}$ =450 nm) ceramics.**

### Supplementary References

1. H. Guo, X. Mao, J. Zhang, R. Tian and S. Wang, *Ceramics International*, 2019, **45**, 5080-5086.
2. C. Chen, X. Li, Y. Feng, H. Lin, X. Yi, Y. Tang, S. Zhang and S. Zhou, *Journal of Materials Science*, 2015, **50**, 2517-2521.
